# Supplementary material
Source: PubMed Central journal article supplement (PMC6445662)

**Supplemental Figure Legends (captions)****Supplementary Figure 1.** *Establishment of chimerism in the lamina propria of parabionts.* **(a)**

Microscopic analysis of the small intestine of a CAG-tdTomato mouse (i) conjoined with a CAG-GFP mouse (ii). Original magnification 20x; scale bars 100  $\mu\text{m}$ . **(b)** Quantification of the number of transferred cells per 40x field of view. Data are presented as means  $\pm$  SEM.

**Supplementary Figure 2.** *Surgical separation of parabiosis pairs prior to TNBS challenge moderately reduces the rescue effects.* **(a)**

Body weight change in an unpaired, sham surgery mouse (n=3) and parabiont separation surgery mouse (n=6) 24 hours prior to 2.5 mg TNBS instillation, and parabiont mouse (n=11 pairs) with 2.5 mg TNBS instillation. Mice whose weight loss of 20% or more were euthanized. Data are presented as means  $\pm$  SEM. **(b)** (i)

Macroscopic images of colons from day3 after 2.5 mg TNBS instillation. (ii) Colon length of 2.5 mg TNBS-treated parabiosis mouse (n=8 pairs), unpaired sham mouse (n=3), and parabiont separation mouse (n=6). Data are presented as means  $\pm$  SEM. **(c)** Representative H&E-stained sections from an unpaired sham mouse (i), parabiont mouse (ii), and parabiosis separation mouse (iii). Colon 3 days after 2.5 mg TNBS instillation. Original magnification 20x; scale bars 100  $\mu\text{m}$ . Data are presented as means  $\pm$  SEM. (\*\*p < 0.01, \*\*\*p < 0.001)

**Supplementary Figure 3.** *Depletion of bone marrow cells by 4 Gy radiation in an unpaired mouse.* **(a)**

Flow cytometry analysis shows the number of total cells in bone marrow with and without 4 Gy whole-body radiation (i and ii) The percentage of CD45<sup>+</sup> cells in bone marrow is shown with and without 4 Gy whole-body radiation (iii and iv).

**Supplementary Figure 4.** *Recruitment of adaptive immune cells is dispensable for ameliorating intestinal inflammation in irradiated parabionts.* (a) Body weight change in 8 Gy irradiated parabiont mice of wild-type to wild-type pairings (n=7 pairs), Rag1<sup>-/-</sup> to wild-type pairings (n=3 pairs), and unpaired mice (n=14). Data are presented as means ± SEM. (b) Representative H&E-stained sections from 8 Gy irradiated unpaired mice (i), wild-type to wild-type pairings (ii), and Rag1<sup>-/-</sup> to wild-type pairings (iii). Original magnification 20x; scale bars 100 µm.

**Supplementary Figure 5.** *The effect of recruitment of bone marrow cells on mucosal healing in TNBS-induced colitis.* (a) Body weight change in 2.5 mg TNBS-received parabiont mice (n=7 pairs), unpaired mice with bone marrow cell injection (n=3), and unpaired mice without bone marrow cell injection. (n=10). Data are presented as means ± SEM. (b)(i) Macroscopic images of colons from 2.5 mg TNBS-received parabiont mice, unpaired mice with or without bone marrow cell injection. (ii) Colon length of 2.5 mg TNBS-received parabiont mice (n=7 pairs), unpaired mice with bone marrow cell injection (n=3), and unpaired mice without bone marrow cell injection. (n=10). Data are presented as means ± SEM. (c) Representative H&E-stained sections from TNBS-received parabiont mice (i), unpaired mice without bone marrow cell injection (ii), and unpaired mice with bone marrow cell injection (iii). Original magnification 20x; scale bars 100 µm. (d) Body weight change in 8 Gy irradiated unpaired mice with vehicle (n=2), CD45<sup>+</sup> bone marrow cell (n=2), and CD45<sup>-</sup> bone marrow cell injection (n=2). Data are presented as means ± SEM. (e) Representative H&E-stained sections from 8 Gy irradiated unpaired mice with vehicle (i), CD45<sup>+</sup> bone marrow cell (ii), and CD45<sup>-</sup> bone marrow cell injection (iii). Original magnification 20x; scale bars 100 µm. (\*p < 0.05, \*\*p < 0.01, \*\*\*p < 0.001, \*\*\*\*p < 0.0001)

**Supplementary Figure 6.** The effects of *MadCam-1* or *CCR2* inhibitors on the protective effects of parabiosis on intestinal healing in TNBS-induced colitis. **(a)** Body weight change in 2.5 mg TNBS-received parabiont mice in control group (n=1 pair), with CCR2 inhibitor (n=2 pairs), and with MAdCam-1 inhibitor (n=2 pairs). Data are presented as means  $\pm$  SEM. **(b)(i)** Macroscopic images of colons from 2.5 mg TNBS-received parabiont mice in control group, with CCR2 inhibitor, and with MAdCam-1 inhibitor. **(ii)** Colon length of 2.5 mg TNBS-received parabiont mice in control group (n=1 pair), with CCR2 inhibitor (n=2 pairs), and with MAdCam-1 inhibitor (n=2 pairs). Data are presented as means  $\pm$  SEM. **(c)** Representative H&E-stained sections from TNBS-received parabiont mice in control group (i), with CCR2 inhibitor (ii), and with MAdCam-1 inhibitor (iii); Representative Alcian blue-stained sections from TNBS-received parabiont mice TNBS-received parabiont mice in control group (iv), with CCR2 inhibitor (iv), and with MAdCam-1 inhibitor (vi). Original magnification 20x; scale bars 100  $\mu$ m.

### Supplemental Tables

| Group                                            | % tdTomato <sup>+</sup> Ecad <sup>+</sup> cells |
|--------------------------------------------------|-------------------------------------------------|
| Radiation, Bone marrow cell inj., Non-parabiosis | 0.3                                             |
| Uninjured, Parabiosis                            | 2.2                                             |
| Radiation, Parabiosis                            | 1.5                                             |
| TNBS, Parabiosis                                 | 0.2                                             |

**Table 1.** Quantification of tdTomato<sup>+</sup> cells that co-localize with the epithelial marker E-cadherin.

The percentage of tdTomato/Ecad-double positive cells out of total tdTomato<sup>+</sup> cells shows the proportion of donor-derived intestinal epithelial cells in bone marrow cell transplant recipients with 12 Gy radiation (n=2), uninjured parabionts (n=2 pairs), 8 Gy radiated parabiosis mice (n=3 pairs), and TNBS-treated parabiosis mice (n=2 pairs).

| <b>Histological parameters for radiation enteritis</b>                                                                                          |
|-------------------------------------------------------------------------------------------------------------------------------------------------|
| Preservation of epithelial architecture<br>-Epithelial injury/distorted villi<br>-Thinner villi<br>-Shortened length of villi<br>-Denuded villi |
| Decreased number of crypts<br>-Glandular dropout                                                                                                |
| Prominent Paneth cells                                                                                                                          |
| Infiltration of inflammatory cells in the lamina propria<br>(lamina propria expansion)                                                          |

**Supplementary Table 2.** Histological scoring system for radiated induced enteritis; Evidence of intestinal mucosal injury was quantified in H&E stained sections of small intestine by a pathologist (LV) blinded to the treatment group (0=None, 1=Mild, 2=Moderate, 3=High).

| <b>Histological parameters for TNBS colitis</b>                                             |
|---------------------------------------------------------------------------------------------|
| Epithelial injury<br>-Increased number of apoptotic bodies in crypts<br>-Crypt degeneration |
| Goblet cell phenotype<br>-Mucin depletion or mucin extrusion                                |
| Decreased number of crypts<br>-Glandular dropout                                            |
| Inflammation<br>-Inflammatory lamina propria expansion                                      |
| Ulceration                                                                                  |
| Pseudomembrane                                                                              |
| Ischemic changes                                                                            |
| Mucosal erosion                                                                             |

**Supplementary Table 3.** Histological scoring system TNBS induced colitis Evidence of intestinal mucosal injury was quantified in H&E stained sections of colon by a pathologist (LV) blinded to the treatment group (0=None, 1=Mild, 2=Moderate, 3=High).

| Gene          | Forward primer            | Reverse primer           | Size   |
|---------------|---------------------------|--------------------------|--------|
| RPLO          | GGCGACCTGGAAGTCCAAC       | CCATCAGCACCACAGCCTTC     | 143 bp |
| TNF- $\alpha$ | TTCCGAATTCACCTGGAGCCTCGAA | TGCACCTCAGGGAAGAATCTGGAA | 144 bp |
| IL-1 $\beta$  | AGTGTGGATCCCAAGCAATACCCA  | TGTCCTGACCACTGTTGTTTCCCA | 175 bp |
| CCL2          | ATGCAGTTAACGCCCCACTC      | CCCATTCTTCTTGGGGTCA      | 171 bp |
| SI            | ATCCAGGTTCTGAAGGAGAAGCACT | TTCGCTTGAATGCTGTGTGTTCCG | 154 bp |
| CAR1          | ACAGTAGCAACCAATCTGTTCTG   | AGGCCATCAGCCTTGGAGA      | 207 bp |
| Lipocalin2    | ACAACCAGTTCGCCATGGTAT     | AAGCGGGTGAAACGTTCTT      | 121 bp |
| MucII         | TAGTGGAGATTGTGCCGCTGAAGT  | AGAGCCCATCGAAGGTGACAAAGT | 168 bp |
| iNOS          | CTGCTGGTGGTGACAAGCACATTT  | ATGTCATGAGCAAAGGCGCAGAAC | 167 bp |
| Lgr5          | TGAGCGGGACCTTGAAGATTTCTT  | TACCAAATAGGTGCTCACAGGGCT | 116 bp |
| Lysozyme      | AAGCTGGCTGACTGGGTGTGTTTA  | CACTGCAATTGATCCCACAGGCAT | 178 bp |
| Dlck1         | CAAATGCCGAGGCAAAGAGCACAT  | ACAGTTCAGTCGGCACATCCATCT | 113 bp |
| IL-6          | CCAATTTCCAATGCTCTCCT      | ACCACAGTGAGGAATGTCCA     | 182 bp |
| CXCL2         | TCCAGAGCTTGAGTGTGACG      | CTTCCGTTGAGGGACAGCAG     | 196 bp |

**Supplemental Table 4.** List of primers for RT-PCR.

a

## Parabiosis

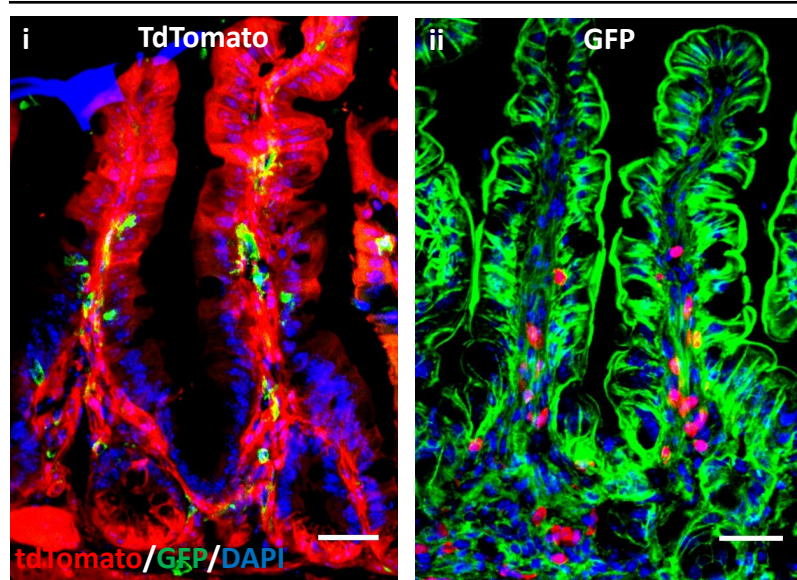

b

## Quantification of migrated cells in lamina propria

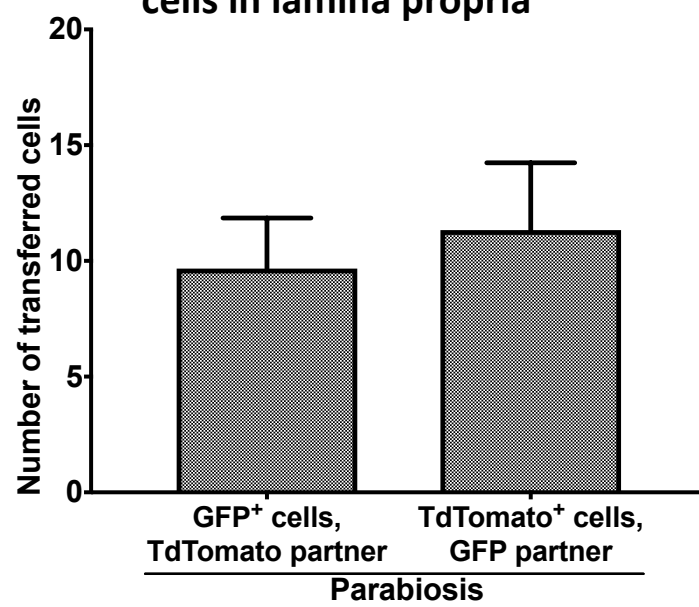



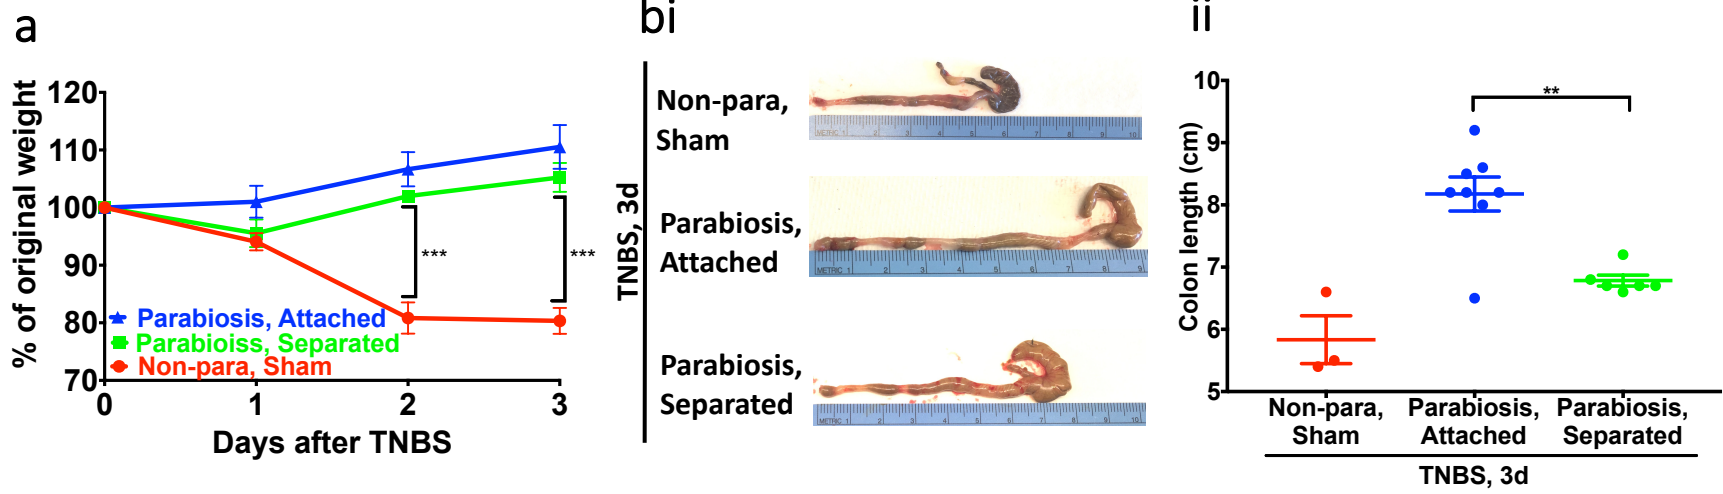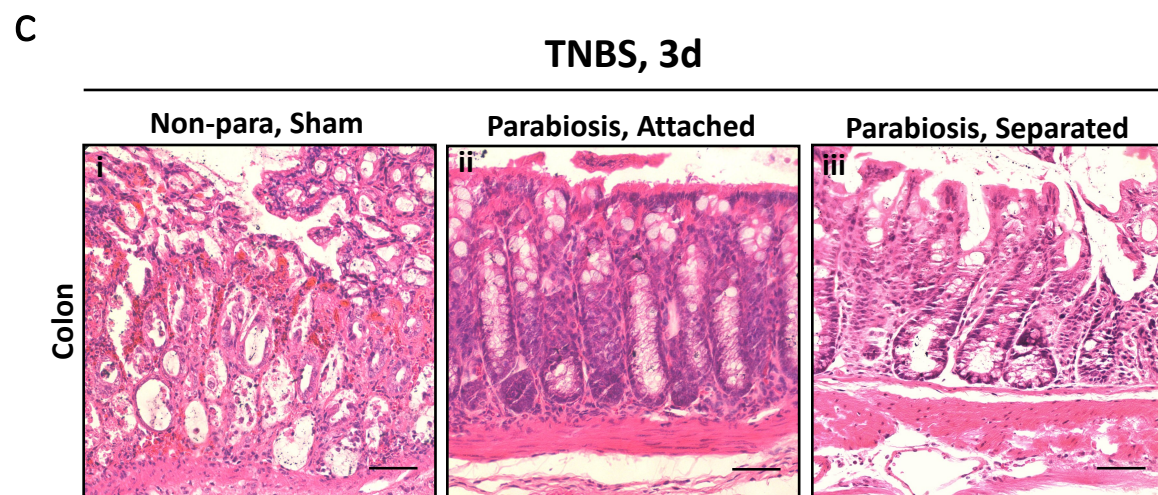

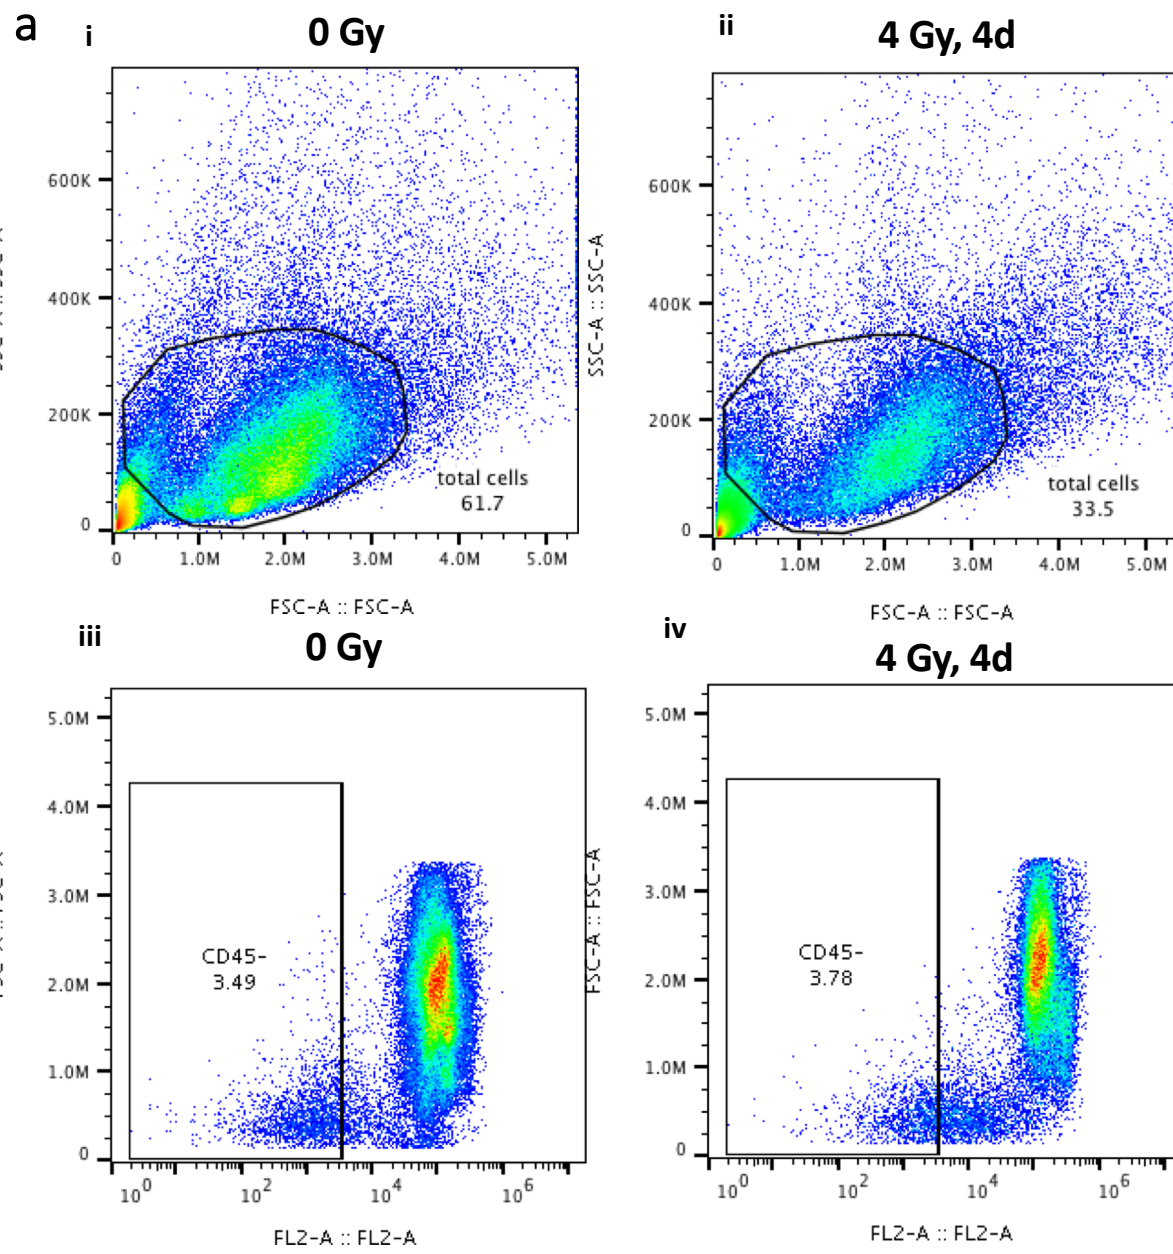

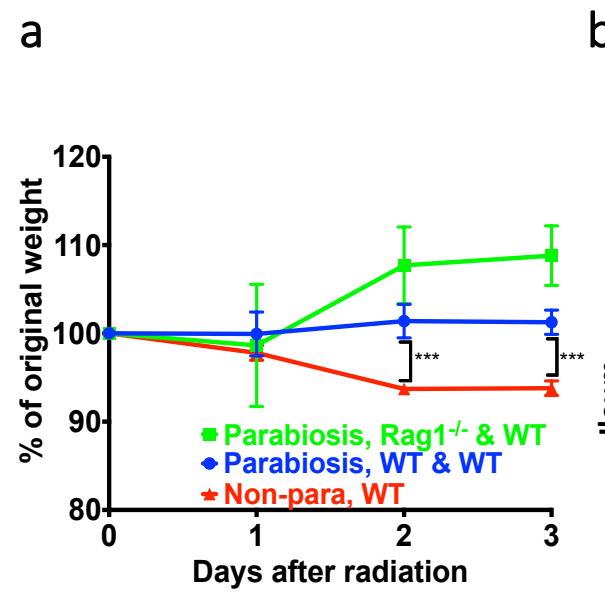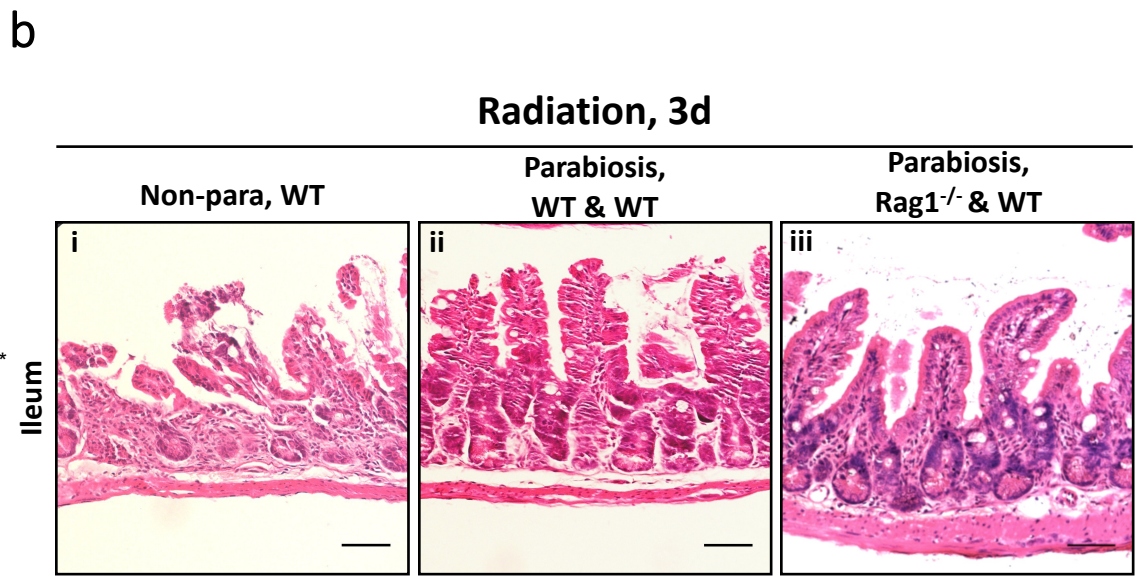



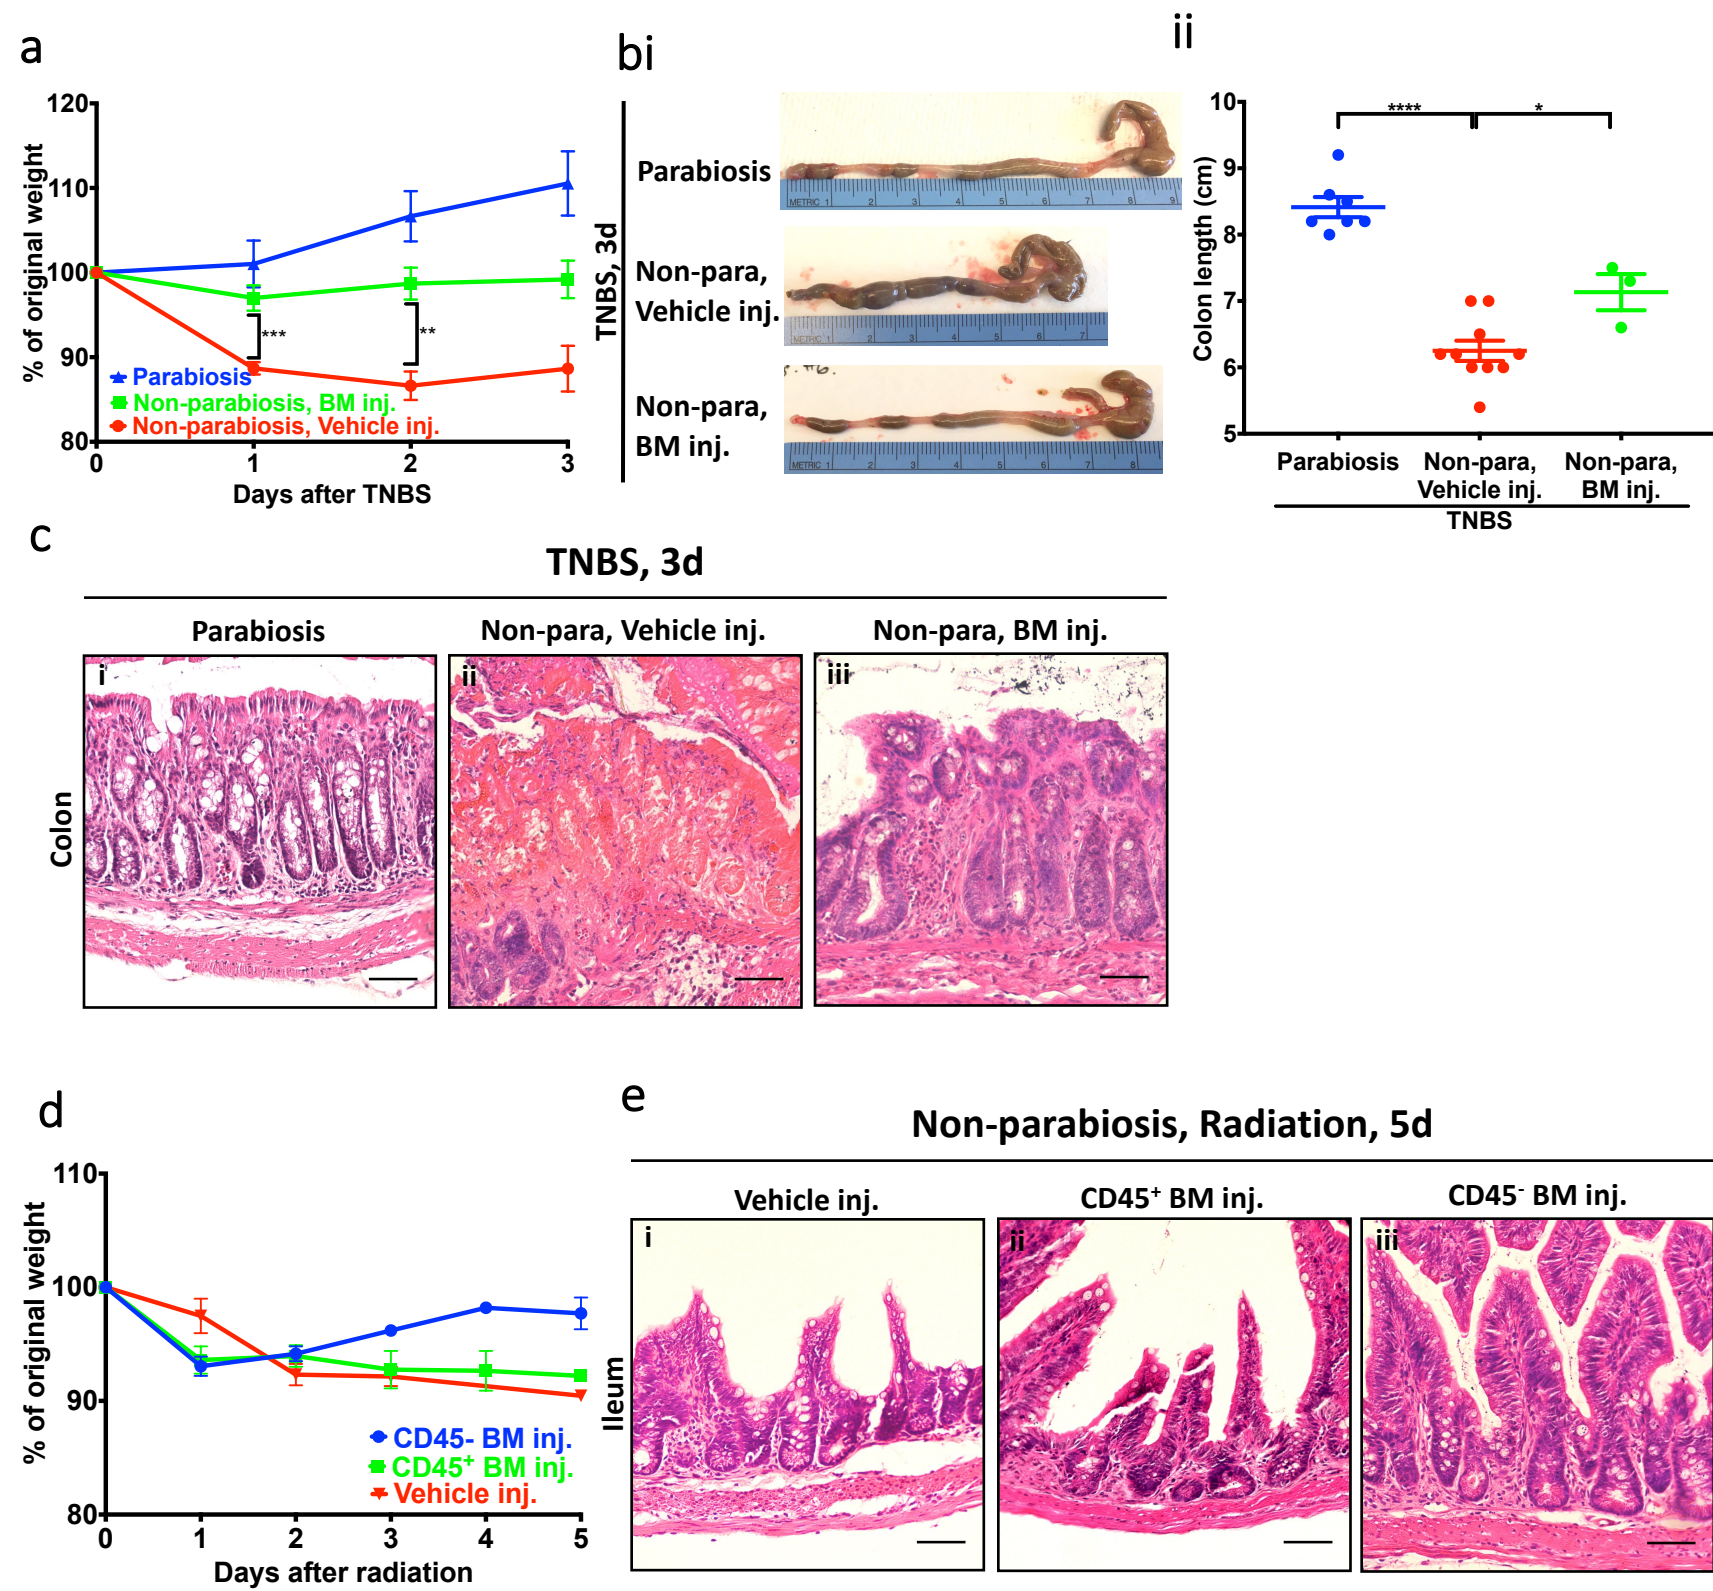

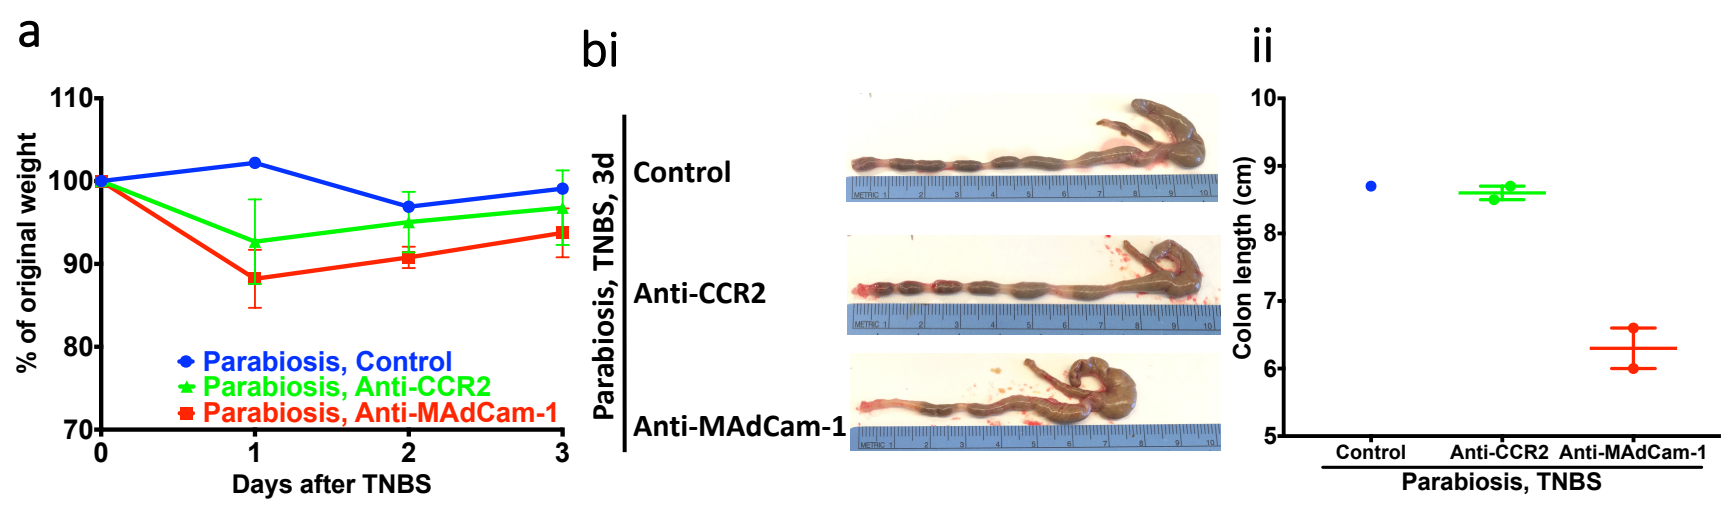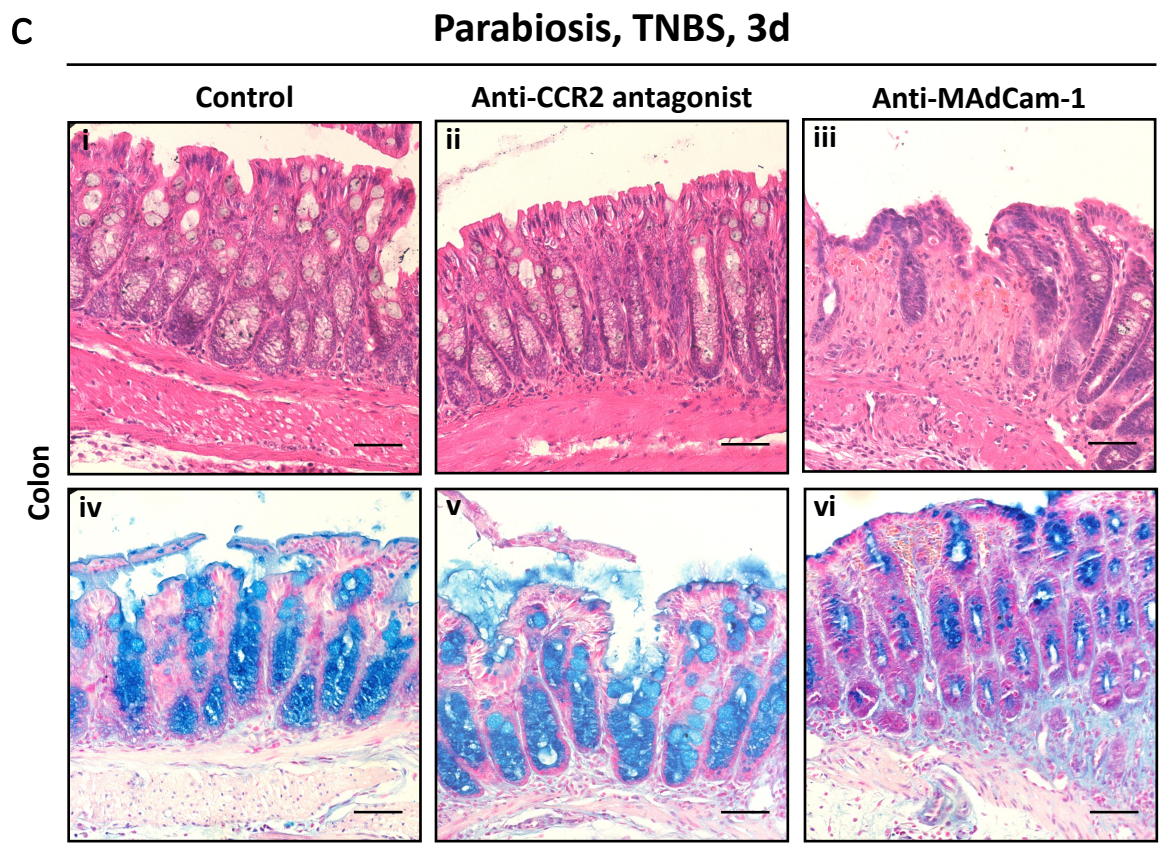

Supplement: NIHMS1515486-supplement-1.pdf [file NIHMS1515486-supplement-1.pdf]
